# Supplementary material for: How survival curves affect populations’ vulnerability to climate change
Source: PLoS One. 2018 Sep 6;13(9):e0203124. doi: 10.1371/journal.pone.0203124 (PMC6126862; doi:10.1371/journal.pone.0203124)
Supplement: S2 File — (XLS) [file pone.0203124.s002.xls]

## Sheet: Basic data
SPECIES	AGE, k	AGE_UNITS	COHORT	SURVIVAL, sk*		*Probability of surviving this class
Loxodonta africana	0	years	126	0.933514
Loxodonta africana	1	years	117	0.963915
Loxodonta africana	2	years	112	0.980327
Loxodonta africana	3	years	109	0.981684
Loxodonta africana	4	years	107	0.988377
Loxodonta africana	5	years	105	0.993811
Loxodonta africana	6	years	104	0.995641
Loxodonta africana	7	years	103	0.996247
Loxodonta africana	8	years	102	0.994035
Loxodonta africana	9	years	101	1
Loxodonta africana	10	years	101	0.987052
Loxodonta africana	11	years	99	1
Loxodonta africana	12	years	99	0.99744
Loxodonta africana	13	years	98	0.996472
Loxodonta africana	14	years	97	0.992596
Loxodonta africana	15	years	96	0.984109
Loxodonta africana	16	years	94	0.988795
Loxodonta africana	17	years	92	0.993001
Loxodonta africana	18	years	91	0.991945
Loxodonta africana	19	years	90	0.975977
Loxodonta africana	20	years	87	0.997227
Loxodonta africana	21	years	86	0.973927
Loxodonta africana	22	years	83	0.986436
Loxodonta africana	23	years	81	0.998914
Loxodonta africana	24	years	80	0.999638
Loxodonta africana	25	years	79	0.97717
Loxodonta africana	26	years	77	0.97812
Loxodonta africana	27	years	75	0.982559
Loxodonta africana	28	years	73	0.974918
Loxodonta africana	29	years	71	0.987334
Loxodonta africana	30	years	70	0.987172
Loxodonta africana	31	years	69	0.97198
Loxodonta africana	32	years	67	0.984123
Loxodonta africana	33	years	65	0.975377
Loxodonta africana	34	years	63	0.95778
Loxodonta africana	35	years	60	0.986367
Loxodonta africana	36	years	59	0.988482
Loxodonta africana	37	years	58	0.990678
Loxodonta africana	38	years	57	0.955304
Loxodonta africana	39	years	54	0.965526
Loxodonta africana	40	years	52	0.977046
Loxodonta africana	41	years	50	0.892455
Loxodonta africana	42	years	44	0.960807
Loxodonta africana	43	years	42	0.971994
Loxodonta africana	44	years	40	0.962417
Loxodonta africana	45	years	38	0.970062
Loxodonta africana	46	years	36	0.964441
Loxodonta africana	47	years	34	1
Loxodonta africana	48	years	34	0.998608
Loxodonta africana	49	years	33	0.956809
Loxodonta africana	50	years	31	0.92428
Loxodonta africana	51	years	28	0.955888
Loxodonta africana	52	years	26	0.999176
Loxodonta africana	53	years	25	0.904328
Loxodonta africana	54	years	22	0.915184
Loxodonta africana	55	years	20	1
Loxodonta africana	56	years	20	0.999003
Loxodonta africana	57	years	19	0.894263
Loxodonta africana	58	years	16	0.920802
Loxodonta africana	59	years	14	1
Loxodonta africana	60	years	14	1
Loxodonta africana	61	years	14	1.00121
Loxodonta africana	62	years	14	0.679365
Loxodonta africana	64	years	9	0.996438
Loxodonta africana	64	years	8	0.342252
Loxodonta africana	65	years	2	0.342252
Loxodonta africana	66	years	1	--
Orcinus orca	0	years	50	0.972
Orcinus orca	1	years	48	0.975
Orcinus orca	2	years	46	0.975
Orcinus orca	3	years	44	0.985
Orcinus orca	4	years	43	0.985
Orcinus orca	5	years	42	0.985
Orcinus orca	6	years	41	0.987
Orcinus orca	7	years	40	0.987
Orcinus orca	8	years	39	0.987
Orcinus orca	9	years	38	0.987
Orcinus orca	10	years	37	0.991
Orcinus orca	11	years	36	0.991
Orcinus orca	12	years	35	0.991
Orcinus orca	13	years	34	0.991
Orcinus orca	14	years	33	0.991
Orcinus orca	15	years	32	1
Orcinus orca	16	years	32	1
Orcinus orca	17	years	32	1
Orcinus orca	18	years	32	1
Orcinus orca	19	years	32	1
Orcinus orca	20	years	32	0.997
Orcinus orca	21	years	31	0.997
Orcinus orca	22	years	30	0.997
Orcinus orca	23	years	29	0.997
Orcinus orca	24	years	28	0.997
Orcinus orca	25	years	27	0.997
Orcinus orca	26	years	26	0.997
Orcinus orca	27	years	25	0.997
Orcinus orca	28	years	24	0.997
Orcinus orca	29	years	23	0.997
Orcinus orca	30	years	22	0.996
Orcinus orca	31	years	21	0.996
Orcinus orca	32	years	20	0.996
Orcinus orca	33	years	19	0.996
Orcinus orca	34	years	18	0.996
Orcinus orca	35	years	17	0.996
Orcinus orca	36	years	16	0.996
Orcinus orca	37	years	15	0.996
Orcinus orca	38	years	14	0.996
Orcinus orca	39	years	13	0.996
Orcinus orca	40	years	12	0.953
Orcinus orca	41	years	11	0.953
Orcinus orca	42	years	10	0.953
Orcinus orca	43	years	9	0.953
Orcinus orca	44	years	8	0.953
Orcinus orca	45	years	7	0.953
Orcinus orca	46	years	6	0.953
Orcinus orca	47	years	5	0.953
Orcinus orca	48	years	4	0.953
Orcinus orca	49	years	3	0.953
Orcinus orca	50	years	2	0.932
Orcinus orca	51	years	1	--
Ovis canadensis	0	years	100	0.835
Ovis canadensis	1	years	83	0.935
Ovis canadensis	2	years	77	0.935
Ovis canadensis	3	years	71	0.935
Ovis canadensis	4	years	66	0.93
Ovis canadensis	5	years	61	0.92
Ovis canadensis	6	years	56	0.905
Ovis canadensis	7	years	50	0.89
Ovis canadensis	8	years	44	0.87
Ovis canadensis	9	years	38	0.85
Ovis canadensis	10	years	32	0.81
Ovis canadensis	11	years	25	0.765
Ovis canadensis	12	years	19	0.7
Ovis canadensis	13	years	13	0.64
Ovis canadensis	14	years	8	0.57
Ovis canadensis	15	years	4	0.48
Ovis canadensis	16	years	1	--
Arctocephalus tropicalis	0	years	80	0.939
Arctocephalus tropicalis	1	years	75	0.939
Arctocephalus tropicalis	2	years	70	0.939
Arctocephalus tropicalis	3	years	62	0.939
Arctocephalus tropicalis	4	years	62	0.939
Arctocephalus tropicalis	5	years	61	0.939
Arctocephalus tropicalis	6	years	51	0.982
Arctocephalus tropicalis	7	years	49	0.982
Arctocephalus tropicalis	8	years	49	0.982
Arctocephalus tropicalis	9	years	47	0.982
Arctocephalus tropicalis	10	years	46	0.982
Arctocephalus tropicalis	11	years	46	0.982
Arctocephalus tropicalis	12	years	45	0.855
Arctocephalus tropicalis	13	years	40	0.855
Arctocephalus tropicalis	14	years	34	0.855
Arctocephalus tropicalis	15	years	27	0.855
Arctocephalus tropicalis	16	years	21	0.855
Arctocephalus tropicalis	17	years	16	0.855
Arctocephalus tropicalis	18	years	13	0.855
Arctocephalus tropicalis	19	years	10	0.855
Arctocephalus tropicalis	20	years	8	0.855
Arctocephalus tropicalis	21	years	7	0.855
Arctocephalus tropicalis	22	years	5	0.855
Arctocephalus tropicalis	23	years	3	0.855
Arctocephalus tropicalis	24	years	2	0.855
Arctocephalus tropicalis	25	years	1	--
Diomedea exulans	0	years	400	0.862876
Diomedea exulans	1	years	336	0.862876
Diomedea exulans	2	years	283	0.862876
Diomedea exulans	3	years	250	0.862876
Diomedea exulans	4	years	207	0.862876
Diomedea exulans	5	years	177	0.950974
Diomedea exulans	6	years	175	0.950974
Diomedea exulans	7	years	164	0.950974
Diomedea exulans	8	years	151	0.950974
Diomedea exulans	9	years	147	0.98
Diomedea exulans	10	years	144	0.952386
Diomedea exulans	11	years	125	0.92753
Diomedea exulans	12	years	114	0.922055
Diomedea exulans	13	years	104	0.952634
Diomedea exulans	14	years	95	0.971238
Diomedea exulans	15	years	91	0.937878
Diomedea exulans	16	years	84	0.916427
Diomedea exulans	17	years	74	0.894708
Diomedea exulans	18	years	66	0.954515
Diomedea exulans	19	years	61	0.924018
Diomedea exulans	20	years	58	0.894188
Diomedea exulans	21	years	56	0.969417
Diomedea exulans	22	years	53	0.870776
Diomedea exulans	23	years	46	0.923141
Diomedea exulans	24	years	38	0.923141
Diomedea exulans	25	years	35	0.923141
Diomedea exulans	26	years	29	0.923141
Diomedea exulans	27	years	26	0.923141
Diomedea exulans	28	years	25	0.923141
Diomedea exulans	29	years	23	0.923141
Diomedea exulans	30	years	22	0.923141
Diomedea exulans	31	years	20	0.923141
Diomedea exulans	32	years	17	0.923141
Diomedea exulans	33	years	14	0.923141
Diomedea exulans	34	years	12	0.923141
Diomedea exulans	35	years	11	0.923141
Diomedea exulans	36	years	10	0.923141
Diomedea exulans	37	years	8	0.923141
Diomedea exulans	38	years	7	0.923141
Diomedea exulans	39	years	7	0.923141
Diomedea exulans	40	years	6	0.923141
Diomedea exulans	41	years	5	0.923141
Diomedea exulans	42	years	4	0.923141
Diomedea exulans	43	years	3	0.923141
Diomedea exulans	44	years	2	0.923141
Diomedea exulans	45	years	1	--
Chrysemys picta	0	years	75	0.67
Chrysemys picta	1	years	50	0.76
Chrysemys picta	2	years	38	0.76
Chrysemys picta	3	years	28	0.76
Chrysemys picta	4	years	21	0.76
Chrysemys picta	5	years	15	0.76
Chrysemys picta	6	years	11	0.76
Chrysemys picta	7	years	8	0.76
Chrysemys picta	8	years	6	0.76
Chrysemys picta	9	years	4	0.76
Chrysemys picta	10	years	3	0.76
Chrysemys picta	11	years	2	0.76
Chrysemys picta	12	years	1	--
Oligosoma suteri	0	years	30	0.5
Oligosoma suteri	1	years	15	0.5
Oligosoma suteri	2	years	7	0.5
Oligosoma suteri	3	years	3	0.5
Oligosoma suteri	4	years	1	--
Tympanuchus pallidicinctus	0	years	90	0.5085
Tympanuchus pallidicinctus	1	years	51	0.37
Tympanuchus pallidicinctus	2	years	17	0.37
Tympanuchus pallidicinctus	3	years	7	0.37
Tympanuchus pallidicinctus	4	years	3	0.37
Tympanuchus pallidicinctus	5	years	1	--
Dermochelys coriacea	0	years	120000	0.0277473
Dermochelys coriacea	1	years	3329	0.74
Dermochelys coriacea	2	years	2463	0.84
Dermochelys coriacea	3	years	2068	0.87
Dermochelys coriacea	4	years	1799	0.8
Dermochelys coriacea	5	years	1439	0.85
Dermochelys coriacea	6	years	1223	0.84
Dermochelys coriacea	7	years	1027	0.74
Dermochelys coriacea	8	years	759	0.75
Dermochelys coriacea	9	years	569	0.75
Dermochelys coriacea	10	years	426	0.76
Dermochelys coriacea	11	years	323	0.74
Dermochelys coriacea	12	years	239	0.75
Dermochelys coriacea	13	years	179	0.85
Dermochelys coriacea	14	years	152	0.86
Dermochelys coriacea	15	years	130	0.73
Dermochelys coriacea	16	years	94	0.81
Dermochelys coriacea	17	years	76	0.81
Dermochelys coriacea	18	years	61	0.78
Dermochelys coriacea	19	years	47	0.79
Dermochelys coriacea	20	years	37	0.84
Dermochelys coriacea	21	years	31	0.82
Dermochelys coriacea	22	years	25	0.8
Dermochelys coriacea	23	years	20	0.8
Dermochelys coriacea	24	years	16	0.82
Dermochelys coriacea	25	years	13	0.83
Dermochelys coriacea	26	years	10	0.83
Dermochelys coriacea	27	years	8	0.79
Dermochelys coriacea	28	years	6	0.82
Dermochelys coriacea	29	years	4	0.79
Dermochelys coriacea	30	years	3	0.8
Dermochelys coriacea	31	years	2	0.75
Dermochelys coriacea	32	years	1	--
Dosidicus gigas	0	days	17300000000	0.657587
Dosidicus gigas	1	days	11376256489	0.657587
Dosidicus gigas	2	days	7480879289	0.657587
Dosidicus gigas	3	days	4919329569	0.657587
Dosidicus gigas	4	days	3234887568	0.657587
Dosidicus gigas	5	days	2127220270	0.657587
Dosidicus gigas	6	days	1398832566	0.657587
Dosidicus gigas	7	days	919854222	0.657587
Dosidicus gigas	8	days	604884252	0.657587
Dosidicus gigas	9	days	397764069	0.775076
Dosidicus gigas	10	days	308297281	0.775076
Dosidicus gigas	11	days	238953744	0.775076
Dosidicus gigas	12	days	185207250	0.775076
Dosidicus gigas	13	days	143549647	0.775076
Dosidicus gigas	14	days	111261849	0.775076
Dosidicus gigas	15	days	86236360	0.775076
Dosidicus gigas	16	days	66839710	0.775076
Dosidicus gigas	17	days	51805837	0.775076
Dosidicus gigas	18	days	40153447	0.775076
Dosidicus gigas	19	days	31121962	0.775076
Dosidicus gigas	20	days	24121877	0.775076
Dosidicus gigas	21	days	18696281	0.775076
Dosidicus gigas	22	days	14491033	0.775076
Dosidicus gigas	23	days	11231648	0.775076
Dosidicus gigas	24	days	8705377	0.775076
Dosidicus gigas	25	days	6747326	0.908564
Dosidicus gigas	26	days	6130374	0.908564
Dosidicus gigas	27	days	5569834	0.908564
Dosidicus gigas	28	days	5060548	0.908564
Dosidicus gigas	29	days	4597829	0.908564
Dosidicus gigas	30	days	4177419	0.908564
Dosidicus gigas	31	days	3795450	0.908564
Dosidicus gigas	32	days	3448407	0.908564
Dosidicus gigas	33	days	3133097	0.908564
Dosidicus gigas	34	days	2846617	0.908564
Dosidicus gigas	35	days	2586332	0.908564
Dosidicus gigas	36	days	2349847	0.908564
Dosidicus gigas	37	days	2134985	0.908564
Dosidicus gigas	38	days	1939769	0.908564
Dosidicus gigas	39	days	1762403	0.908564
Dosidicus gigas	40	days	1601255	0.908564
Dosidicus gigas	41	days	1454841	0.908564
Dosidicus gigas	42	days	1321815	0.908564
Dosidicus gigas	43	days	1200952	0.908564
Dosidicus gigas	44	days	1091141	0.908564
Dosidicus gigas	45	days	991370	0.908564
Dosidicus gigas	46	days	900722	0.908564
Dosidicus gigas	47	days	818363	0.908564
Dosidicus gigas	48	days	743534	0.908564
Dosidicus gigas	49	days	675547	0.908564
Dosidicus gigas	50	days	613777	0.908564
Dosidicus gigas	51	days	557655	0.908564
Dosidicus gigas	52	days	506665	0.908564
Dosidicus gigas	53	days	460337	0.908564
Dosidicus gigas	54	days	418245	0.908564
Dosidicus gigas	55	days	380002	0.908564
Dosidicus gigas	56	days	345255	0.908564
Dosidicus gigas	57	days	313686	0.908564
Dosidicus gigas	58	days	285003	0.908564
Dosidicus gigas	59	days	258943	0.908564
Dosidicus gigas	60	days	235266	0.908564
Dosidicus gigas	61	days	213754	0.908564
Dosidicus gigas	62	days	194209	0.908564
Dosidicus gigas	63	days	176451	0.908564
Dosidicus gigas	64	days	160316	0.908564
Dosidicus gigas	65	days	145657	0.96501
Dosidicus gigas	66	days	140560	0.96501
Dosidicus gigas	67	days	135641	0.96501
Dosidicus gigas	68	days	130894	0.96501
Dosidicus gigas	69	days	126314	0.96501
Dosidicus gigas	70	days	121894	0.96501
Dosidicus gigas	71	days	117628	0.96501
Dosidicus gigas	72	days	113512	0.96501
Dosidicus gigas	73	days	109540	0.96501
Dosidicus gigas	74	days	105707	0.96501
Dosidicus gigas	75	days	102008	0.96501
Dosidicus gigas	76	days	98438	0.96501
Dosidicus gigas	77	days	94993	0.96501
Dosidicus gigas	78	days	91669	0.96501
Dosidicus gigas	79	days	88461	0.96501
Dosidicus gigas	80	days	85365	0.96501
Dosidicus gigas	81	days	82378	0.96501
Dosidicus gigas	82	days	79495	0.96501
Dosidicus gigas	83	days	76713	0.96501
Dosidicus gigas	84	days	74028	0.96501
Dosidicus gigas	85	days	71437	0.96501
Dosidicus gigas	86	days	68937	0.96501
Dosidicus gigas	87	days	66524	0.96501
Dosidicus gigas	88	days	64196	0.96501
Dosidicus gigas	89	days	61949	0.96501
Dosidicus gigas	90	days	59781	0.96501
Dosidicus gigas	91	days	57689	0.96501
Dosidicus gigas	92	days	55670	0.96501
Dosidicus gigas	93	days	53722	0.96501
Dosidicus gigas	94	days	51842	0.96501
Dosidicus gigas	95	days	50028	0.96501
Dosidicus gigas	96	days	48277	0.96501
Dosidicus gigas	97	days	46587	0.96501
Dosidicus gigas	98	days	44956	0.96501
Dosidicus gigas	99	days	43383	0.96501
Dosidicus gigas	100	days	41865	0.96501
Dosidicus gigas	101	days	40400	0.96501
Dosidicus gigas	102	days	38986	0.96501
Dosidicus gigas	103	days	37621	0.96501
Dosidicus gigas	104	days	36304	0.96501
Dosidicus gigas	105	days	35033	0.96501
Dosidicus gigas	106	days	33807	0.96501
Dosidicus gigas	107	days	32624	0.96501
Dosidicus gigas	108	days	31482	0.96501
Dosidicus gigas	109	days	30380	0.96501
Dosidicus gigas	110	days	29317	0.96501
Dosidicus gigas	111	days	28291	0.96501
Dosidicus gigas	112	days	27301	0.96501
Dosidicus gigas	113	days	26345	0.96501
Dosidicus gigas	114	days	25423	0.96501
Dosidicus gigas	115	days	24533	0.96501
Dosidicus gigas	116	days	23674	0.96501
Dosidicus gigas	117	days	22845	0.96501
Dosidicus gigas	118	days	22045	0.96501
Dosidicus gigas	119	days	21273	0.96501
Dosidicus gigas	120	days	20528	0.96501
Dosidicus gigas	121	days	19809	0.96501
Dosidicus gigas	122	days	19115	0.96501
Dosidicus gigas	123	days	18446	0.96501
Dosidicus gigas	124	days	17800	0.96501
Dosidicus gigas	125	days	17177	0.96501
Dosidicus gigas	126	days	16575	0.96501
Dosidicus gigas	127	days	15995	0.96501
Dosidicus gigas	128	days	15435	0.96501
Dosidicus gigas	129	days	14894	0.96501
Dosidicus gigas	130	days	14372	0.96501
Dosidicus gigas	131	days	13869	0.96501
Dosidicus gigas	132	days	13383	0.96501
Dosidicus gigas	133	days	12914	0.96501
Dosidicus gigas	134	days	12462	0.96501
Dosidicus gigas	135	days	12025	0.96501
Dosidicus gigas	136	days	11604	0.96501
Dosidicus gigas	137	days	11197	0.96501
Dosidicus gigas	138	days	10805	0.96501
Dosidicus gigas	139	days	10426	0.96501
Dosidicus gigas	140	days	10061	0.96501
Dosidicus gigas	141	days	9708	0.96501
Dosidicus gigas	142	days	9368	0.96501
Dosidicus gigas	143	days	9040	0.96501
Dosidicus gigas	144	days	8723	0.96501
Dosidicus gigas	145	days	8417	0.96501
Dosidicus gigas	146	days	8122	0.96501
Dosidicus gigas	147	days	7837	0.96501
Dosidicus gigas	148	days	7562	0.96501
Dosidicus gigas	149	days	7297	0.96501
Dosidicus gigas	150	days	7041	0.96501
Dosidicus gigas	151	days	6794	0.96501
Dosidicus gigas	152	days	6556	0.96501
Dosidicus gigas	153	days	6326	0.96501
Dosidicus gigas	154	days	6104	0.96501
Dosidicus gigas	155	days	5890	0.96501
Dosidicus gigas	156	days	5683	0.96501
Dosidicus gigas	157	days	5484	0.96501
Dosidicus gigas	158	days	5292	0.96501
Dosidicus gigas	159	days	5106	0.96501
Dosidicus gigas	160	days	4927	0.96501
Dosidicus gigas	161	days	4754	0.96501
Dosidicus gigas	162	days	4587	0.96501
Dosidicus gigas	163	days	4426	0.96501
Dosidicus gigas	164	days	4271	0.96501
Dosidicus gigas	165	days	4121	0.96501
Dosidicus gigas	166	days	3976	0.96501
Dosidicus gigas	167	days	3836	0.96501
Dosidicus gigas	168	days	3701	0.96501
Dosidicus gigas	169	days	3571	0.986125
Dosidicus gigas	170	days	3521	0.986125
Dosidicus gigas	171	days	3472	0.986125
Dosidicus gigas	172	days	3423	0.986125
Dosidicus gigas	173	days	3375	0.986125
Dosidicus gigas	174	days	3328	0.986125
Dosidicus gigas	175	days	3281	0.986125
Dosidicus gigas	176	days	3235	0.986125
Dosidicus gigas	177	days	3190	0.986125
Dosidicus gigas	178	days	3145	0.986125
Dosidicus gigas	179	days	3101	0.986125
Dosidicus gigas	180	days	3057	0.986125
Dosidicus gigas	181	days	3014	0.986125
Dosidicus gigas	182	days	2972	0.986125
Dosidicus gigas	183	days	2930	0.986125
Dosidicus gigas	184	days	2889	0.986125
Dosidicus gigas	185	days	2848	0.986125
Dosidicus gigas	186	days	2808	0.986125
Dosidicus gigas	187	days	2769	0.986125
Dosidicus gigas	188	days	2730	0.986125
Dosidicus gigas	189	days	2692	0.986125
Dosidicus gigas	190	days	2654	0.986125
Dosidicus gigas	191	days	2617	0.986125
Dosidicus gigas	192	days	2580	0.986125
Dosidicus gigas	193	days	2544	0.986125
Dosidicus gigas	194	days	2508	0.986125
Dosidicus gigas	195	days	2473	0.986125
Dosidicus gigas	196	days	2438	0.986125
Dosidicus gigas	197	days	2404	0.986125
Dosidicus gigas	198	days	2370	0.986125
Dosidicus gigas	199	days	2337	0.986125
Dosidicus gigas	200	days	2304	0.986125
Dosidicus gigas	201	days	2272	0.986125
Dosidicus gigas	202	days	2240	0.986125
Dosidicus gigas	203	days	2208	0.986125
Dosidicus gigas	204	days	2177	0.986125
Dosidicus gigas	205	days	2146	0.986125
Dosidicus gigas	206	days	2116	0.986125
Dosidicus gigas	207	days	2086	0.986125
Dosidicus gigas	208	days	2057	0.986125
Dosidicus gigas	209	days	2028	0.986125
Dosidicus gigas	210	days	1999	0.986125
Dosidicus gigas	211	days	1971	0.986125
Dosidicus gigas	212	days	1943	0.986125
Dosidicus gigas	213	days	1916	0.986125
Dosidicus gigas	214	days	1889	0.986125
Dosidicus gigas	215	days	1862	0.986125
Dosidicus gigas	216	days	1836	0.986125
Dosidicus gigas	217	days	1810	0.986125
Dosidicus gigas	218	days	1784	0.986125
Dosidicus gigas	219	days	1759	0.986125
Dosidicus gigas	220	days	1734	0.986125
Dosidicus gigas	221	days	1709	0.986125
Dosidicus gigas	222	days	1685	0.986125
Dosidicus gigas	223	days	1661	0.986125
Dosidicus gigas	224	days	1637	0.986125
Dosidicus gigas	225	days	1614	0.986125
Dosidicus gigas	226	days	1591	0.986125
Dosidicus gigas	227	days	1568	0.986125
Dosidicus gigas	228	days	1546	0.986125
Dosidicus gigas	229	days	1524	0.986125
Dosidicus gigas	230	days	1502	0.986125
Dosidicus gigas	231	days	1481	0.986125
Dosidicus gigas	232	days	1460	0.986125
Dosidicus gigas	233	days	1439	0.986125
Dosidicus gigas	234	days	1419	0.986125
Dosidicus gigas	235	days	1399	0.986125
Dosidicus gigas	236	days	1379	0.986125
Dosidicus gigas	237	days	1359	0.986125
Dosidicus gigas	238	days	1340	0.986125
Dosidicus gigas	239	days	1321	0.986125
Dosidicus gigas	240	days	1302	0.986125
Dosidicus gigas	241	days	1283	0.986125
Dosidicus gigas	242	days	1265	0.986125
Dosidicus gigas	243	days	1247	0.986125
Dosidicus gigas	244	days	1229	0.986125
Dosidicus gigas	245	days	1211	0.986125
Dosidicus gigas	246	days	1194	0.986125
Dosidicus gigas	247	days	1177	0.986125
Dosidicus gigas	248	days	1160	0.986125
Dosidicus gigas	249	days	1143	0.986125
Dosidicus gigas	250	days	1127	0.986125
Dosidicus gigas	251	days	1111	0.986125
Dosidicus gigas	252	days	1095	0.986125
Dosidicus gigas	253	days	1079	0.986125
Dosidicus gigas	254	days	1064	0.986125
Dosidicus gigas	255	days	1049	0.986125
Dosidicus gigas	256	days	1034	0.986125
Dosidicus gigas	257	days	1019	0.986125
Dosidicus gigas	258	days	1004	0.986125
Dosidicus gigas	259	days	990	0.986125
Dosidicus gigas	260	days	976	0.986125
Dosidicus gigas	261	days	962	0.986125
Dosidicus gigas	262	days	948	0.986125
Dosidicus gigas	263	days	934	0.986125
Dosidicus gigas	264	days	921	0.986125
Dosidicus gigas	265	days	908	0.986125
Dosidicus gigas	266	days	895	0.986125
Dosidicus gigas	267	days	882	0.986125
Dosidicus gigas	268	days	869	0.986125
Dosidicus gigas	269	days	856	0.986125
Dosidicus gigas	270	days	844	0.986125
Dosidicus gigas	271	days	832	0.986125
Dosidicus gigas	272	days	820	0.986125
Dosidicus gigas	273	days	808	0.986125
Dosidicus gigas	274	days	796	0.986125
Dosidicus gigas	275	days	784	0.986125
Dosidicus gigas	276	days	773	0.986125
Dosidicus gigas	277	days	762	0.986125
Dosidicus gigas	278	days	751	0.986125
Dosidicus gigas	279	days	740	0.986125
Dosidicus gigas	280	days	729	0.986125
Dosidicus gigas	281	days	718	0.986125
Dosidicus gigas	282	days	708	0.986125
Dosidicus gigas	283	days	698	0.986125
Dosidicus gigas	284	days	688	0.986125
Dosidicus gigas	285	days	678	0.986125
Dosidicus gigas	286	days	668	0.986125
Dosidicus gigas	287	days	658	0.986125
Dosidicus gigas	288	days	648	0.986125
Dosidicus gigas	289	days	639	0.986125
Dosidicus gigas	290	days	630	0.986125
Dosidicus gigas	291	days	621	0.986125
Dosidicus gigas	292	days	612	0.986125
Dosidicus gigas	293	days	603	0.986125
Dosidicus gigas	294	days	594	0.986125
Dosidicus gigas	295	days	585	0.986125
Dosidicus gigas	296	days	576	0.986125
Dosidicus gigas	297	days	568	0.986125
Dosidicus gigas	298	days	560	0.986125
Dosidicus gigas	299	days	552	0.986125
Dosidicus gigas	300	days	544	0.986125
Dosidicus gigas	301	days	536	0.986125
Dosidicus gigas	302	days	528	0.986125
Dosidicus gigas	303	days	520	0.986125
Dosidicus gigas	304	days	512	0.986125
Dosidicus gigas	305	days	504	0.986125
Dosidicus gigas	306	days	497	0.986125
Dosidicus gigas	307	days	490	0.986125
Dosidicus gigas	308	days	483	0.986125
Dosidicus gigas	309	days	476	0.986125
Dosidicus gigas	310	days	469	0.986125
Dosidicus gigas	311	days	462	0.986125
Dosidicus gigas	312	days	455	0.986125
Dosidicus gigas	313	days	448	0.986125
Dosidicus gigas	314	days	441	0.986125
Dosidicus gigas	315	days	434	0.986125
Dosidicus gigas	316	days	427	0.986125
Dosidicus gigas	317	days	421	0.986125
Dosidicus gigas	318	days	415	0.986125
Dosidicus gigas	319	days	409	0.986125
Dosidicus gigas	320	days	403	0.986125
Dosidicus gigas	321	days	397	0.986125
Dosidicus gigas	322	days	391	0.986125
Dosidicus gigas	323	days	385	0.986125
Dosidicus gigas	324	days	379	0.986125
Dosidicus gigas	325	days	373	0.986125
Dosidicus gigas	326	days	367	0.986125
Dosidicus gigas	327	days	361	0.986125
Dosidicus gigas	328	days	355	0.986125
Dosidicus gigas	329	days	350	0.986125
Dosidicus gigas	330	days	345	0.986125
Dosidicus gigas	331	days	340	0.986125
Dosidicus gigas	332	days	335	0.986125
Dosidicus gigas	333	days	330	0.986125
Dosidicus gigas	334	days	325	0.986125
Dosidicus gigas	335	days	320	0.986125
Dosidicus gigas	336	days	315	0.986125
Dosidicus gigas	337	days	310	0.986125
Dosidicus gigas	338	days	305	0.986125
Dosidicus gigas	339	days	300	0.986125
Dosidicus gigas	340	days	295	0.986125
Dosidicus gigas	341	days	290	0.986125
Dosidicus gigas	342	days	285	0.986125
Dosidicus gigas	343	days	281	0.986125
Dosidicus gigas	344	days	277	0.986125
Dosidicus gigas	345	days	273	0.986125
Dosidicus gigas	346	days	269	0.986125
Dosidicus gigas	347	days	265	0.986125
Dosidicus gigas	348	days	261	0.986125
Dosidicus gigas	349	days	257	0.986125
Dosidicus gigas	350	days	253	0.986125
Dosidicus gigas	351	days	249	0.986125
Dosidicus gigas	352	days	245	0.986125
Dosidicus gigas	353	days	241	0.986125
Dosidicus gigas	354	days	237	0.986125
Dosidicus gigas	355	days	233	0.986125
Dosidicus gigas	356	days	229	0.986125
Dosidicus gigas	357	days	225	0.986125
Dosidicus gigas	358	days	221	0.986125
Dosidicus gigas	359	days	217	0.986125
Dosidicus gigas	360	days	213	0.986125
Dosidicus gigas	361	days	210	0.986125
Dosidicus gigas	362	days	207	0.986125
Dosidicus gigas	363	days	204	0.986125
Dosidicus gigas	364	days	201	0.986125
Dosidicus gigas	365	days	198	0.986125
Dosidicus gigas	366	days	195	0.986125
Dosidicus gigas	367	days	192	0.986125
Dosidicus gigas	368	days	189	0.986125
Dosidicus gigas	369	days	186	0.986125
Dosidicus gigas	370	days	183	0.986125
Dosidicus gigas	371	days	180	0.986125
Dosidicus gigas	372	days	177	0.986125
Dosidicus gigas	373	days	174	0.986125
Dosidicus gigas	374	days	171	0.986125
Dosidicus gigas	375	days	168	0.986125
Dosidicus gigas	376	days	165	0.986125
Dosidicus gigas	377	days	162	0.986125
Dosidicus gigas	378	days	159	0.986125
Dosidicus gigas	379	days	156	0.986125
Dosidicus gigas	380	days	153	0.986125
Dosidicus gigas	381	days	150	0.986125
Dosidicus gigas	382	days	147	0.986125
Dosidicus gigas	383	days	144	0.986125
Dosidicus gigas	384	days	142	0.986125
Dosidicus gigas	385	days	140	0.986125
Dosidicus gigas	386	days	138	0.986125
Dosidicus gigas	387	days	136	0.986125
Dosidicus gigas	388	days	134	0.986125
Dosidicus gigas	389	days	132	0.986125
Dosidicus gigas	390	days	130	0.986125
Dosidicus gigas	391	days	128	0.986125
Dosidicus gigas	392	days	126	0.986125
Dosidicus gigas	393	days	124	0.986125
Dosidicus gigas	394	days	122	0.986125
Dosidicus gigas	395	days	120	0.986125
Dosidicus gigas	396	days	118	0.986125
Dosidicus gigas	397	days	116	0.986125
Dosidicus gigas	398	days	114	0.986125
Dosidicus gigas	399	days	112	0.986125
Dosidicus gigas	400	days	110	0.986125
Dosidicus gigas	401	days	108	0.986125
Dosidicus gigas	402	days	106	0.986125
Dosidicus gigas	403	days	104	0.986125
Dosidicus gigas	404	days	102	0.986125
Dosidicus gigas	405	days	100	0.986125
Dosidicus gigas	406	days	98	0.986125
Dosidicus gigas	407	days	96	0.986125
Dosidicus gigas	408	days	94	0.986125
Dosidicus gigas	409	days	92	0.986125
Dosidicus gigas	410	days	90	0.986125
Dosidicus gigas	411	days	88	0.986125
Dosidicus gigas	412	days	86	0.986125
Dosidicus gigas	413	days	84	0.986125
Dosidicus gigas	414	days	82	0.986125
Dosidicus gigas	415	days	80	0.986125
Dosidicus gigas	416	days	78	0.986125
Dosidicus gigas	417	days	76	0.986125
Dosidicus gigas	418	days	74	0.986125
Dosidicus gigas	419	days	72	0.986125
Dosidicus gigas	420	days	71	0.986125
Dosidicus gigas	421	days	70	0.986125
Dosidicus gigas	422	days	69	0.986125
Dosidicus gigas	423	days	68	0.986125
Dosidicus gigas	424	days	67	0.986125
Dosidicus gigas	425	days	66	0.986125
Dosidicus gigas	426	days	65	0.986125
Dosidicus gigas	427	days	64	0.986125
Dosidicus gigas	428	days	63	0.986125
Dosidicus gigas	429	days	62	0.986125
Dosidicus gigas	430	days	61	0.986125
Dosidicus gigas	431	days	60	0.986125
Dosidicus gigas	432	days	59	0.986125
Dosidicus gigas	433	days	58	0.986125
Dosidicus gigas	434	days	57	0.986125
Dosidicus gigas	435	days	56	0.986125
Dosidicus gigas	436	days	55	0.986125
Dosidicus gigas	437	days	54	0.986125
Dosidicus gigas	438	days	53	0.986125
Dosidicus gigas	439	days	52	0.986125
Dosidicus gigas	440	days	51	0.986125
Dosidicus gigas	441	days	50	0.986125
Dosidicus gigas	442	days	49	0.986125
Dosidicus gigas	443	days	48	0.986125
Dosidicus gigas	444	days	47	0.986125
Dosidicus gigas	445	days	46	0.986125
Dosidicus gigas	446	days	45	0.986125
Dosidicus gigas	447	days	44	0.986125
Dosidicus gigas	448	days	43	0.986125
Dosidicus gigas	449	days	42	0.986125
Dosidicus gigas	450	days	41	0.986125
Dosidicus gigas	451	days	40	0.986125
Dosidicus gigas	452	days	39	0.986125
Dosidicus gigas	453	days	38	0.986125
Dosidicus gigas	454	days	37	0.986125
Dosidicus gigas	455	days	36	0.986125
Dosidicus gigas	456	days	35	0.986125
Dosidicus gigas	457	days	34	0.986125
Dosidicus gigas	458	days	33	0.986125
Dosidicus gigas	459	days	32	0.986125
Dosidicus gigas	460	days	31	0.986125
Dosidicus gigas	461	days	30	0.986125
Dosidicus gigas	462	days	29	0.986125
Dosidicus gigas	463	days	28	0.986125
Dosidicus gigas	464	days	27	0.986125
Dosidicus gigas	465	days	26	0.986125
Dosidicus gigas	466	days	25	0.986125
Dosidicus gigas	467	days	24	0.986125
Dosidicus gigas	468	days	23	0.986125
Dosidicus gigas	469	days	22	0.986125
Dosidicus gigas	470	days	21	0.986125
Dosidicus gigas	471	days	20	0.986125
Dosidicus gigas	472	days	19	0.986125
Dosidicus gigas	473	days	18	0.986125
Dosidicus gigas	474	days	17	0.986125
Dosidicus gigas	475	days	16	0.986125
Dosidicus gigas	476	days	15	0.986125
Dosidicus gigas	477	days	14	0.986125
Dosidicus gigas	478	days	13	0.986125
Dosidicus gigas	479	days	12	0.986125
Dosidicus gigas	480	days	11	0.986125
Dosidicus gigas	481	days	10	0.986125
Dosidicus gigas	482	days	9	0.986125
Dosidicus gigas	483	days	8	0.986125
Dosidicus gigas	484	days	7	0.986125
Dosidicus gigas	485	days	6	0.986125
Dosidicus gigas	486	days	5	0.986125
Dosidicus gigas	487	days	4	0.986125
Dosidicus gigas	488	days	3	0.986125
Dosidicus gigas	489	days	2	0.986125
Dosidicus gigas	490	days	1	--
Chrysemys picta	0	years	10000000	0.00166667
Chrysemys picta	1	years	16666	0.323033
Chrysemys picta	2	years	5383	0.506617
Chrysemys picta	3	years	2727	0.637628
Chrysemys picta	4	years	1738	0.718924
Chrysemys picta	5	years	1249	0.778801
Chrysemys picta	6	years	972	0.826959
Chrysemys picta	7	years	803	0.860708
Chrysemys picta	8	years	691	0.860708
Chrysemys picta	9	years	594	0.860708
Chrysemys picta	10	years	511	0.860708
Chrysemys picta	11	years	439	0.860708
Chrysemys picta	12	years	377	0.860708
Chrysemys picta	13	years	324	0.860708
Chrysemys picta	14	years	278	0.860708
Chrysemys picta	15	years	239	0.860708
Chrysemys picta	16	years	205	0.860708
Chrysemys picta	17	years	176	0.860708
Chrysemys picta	18	years	151	0.860708
Chrysemys picta	19	years	129	0.860708
Chrysemys picta	20	years	111	0.860708
Chrysemys picta	21	years	95	0.860708
Chrysemys picta	22	years	81	0.860708
Chrysemys picta	23	years	69	0.860708
Chrysemys picta	24	years	59	0.860708
Chrysemys picta	25	years	50	0.860708
Chrysemys picta	26	years	43	0.860708
Chrysemys picta	27	years	37	0.860708
Chrysemys picta	28	years	31	0.860708
Chrysemys picta	29	years	26	0.860708
Chrysemys picta	30	years	22	0.860708
Chrysemys picta	31	years	18	0.860708
Chrysemys picta	32	years	15	0.860708
Chrysemys picta	33	years	12	0.860708
Chrysemys picta	34	years	10	0.860708
Chrysemys picta	35	years	8	0.860708
Chrysemys picta	36	years	6	0.860708
Chrysemys picta	37	years	5	0.860708
Chrysemys picta	38	years	4	0.860708
Chrysemys picta	39	years	3	0.860708
Chrysemys picta	40	years	2	0.860708
Chrysemys picta	41	years	1	--
Lobatus gigas	0	years	100000000	0.000248517
Lobatus gigas	1	years	24851	0.082085
Lobatus gigas	2	years	2039	0.246597
Lobatus gigas	3	years	502	0.367879
Lobatus gigas	4	years	184	0.449329
Lobatus gigas	5	years	82	0.496585
Lobatus gigas	6	years	40	0.548812
Lobatus gigas	7	years	21	0.606531
Lobatus gigas	8	years	12	0.67032
Lobatus gigas	9	years	10	0.67032
Lobatus gigas	10	years	6	0.67032
Lobatus gigas	11	years	4	0.67032
Lobatus gigas	12	years	2	0.67032
Lobatus gigas	13	years	1	--

## Sheet: Calculated parameters
											weekly					<-- two proximate populations of same species, diff patterns
	Summary															<-- environ stochasticity forcing demogr stochasticity
	COMMON NAME =>	African bush elephant	Killer whale	Bighorn sheep	Subantartic fur seal	Wandering albatross	Painted turtle	Egg-laying skink	Lesser Prairie-Chicken	Leatherback sea turtle	Humboldt squid	Striped bass	Queen Conch	Monk Seal FFS	Monk Seal MHI
		Loxodonta africana	Orcinus orca	Ovis canadensis	Arctocephalus tropicalis	Diomedea exulans	Chrysemys picta	Oligosoma suteri	Tympanuchus pallidicinctus	Dermochelys coriacea	Dosidicus gigas	Chrysemys picta	Lobatus gigas	Neomonachus schauinslandi	Neomonachus schauinslandi
	STRATEGY =>	I	I	I	I	II	II	II	II	III	III	III	III	III	I
	First-class survival	0.933514	0.972	0.835	0.939	0.862876	0.67	0.5	0.51	0.0277473	0.0531708	0.00166667	0.000248517	0.346	0.86
Av.	Juvenile survival	0.989878	0.9855	0.935	0.939	0.915044	0.76	0.5	0.37	0.795714	0.868705	0.631994	0.164341	0.772774	0.876667
Av.	Adult survival	0.944736	0.983526	0.7775	0.895105	0.925625	0.76	0.5	0.37	0.805	0.906823	0.860708	0.582074	0.841698	0.891031
	AGE OF MATURITY	14	14	5	7	11	7	3	2	16	62	8	4	7	5
	breeding interval	9	5	1	1	2	1	1	1	4	--	41	1	2	1
	Age last rep.(F)	45	36	14	13	45	12	4	5	32	70	41	13	15	15		squid are semelparous, they breed once then die
Av.	Adult fecundity(F)	1.80031	0.101102	3.78522	1.78107	1.12205	5.09125	16	26.2326	2369.5	4.75371e+07	59908.2	5.37578e+06	6.53595	3.27885		everything else is iteroparous, or having multiple reproductive cycles before death
	LIFESPAN	66	51	16	25	45	12	4	5	32	70	41	13	23	29
	s0.s1.s2….sK	0.0173581	0.430042	0.0264186	0.0802088	0.0254637	0.0327359	0.03125	0.00953011	2.48253e-05	2.33735e-09	4.90947e-07	1.86019e-08	0.017	0.0277259
	Survival
	to Age	African bush elephant	Killer whale	Bighorn sheep	Subantartic fur seal	Wandering albatross	Painted turtle	Egg-laying skink	Lesser Prairie-Chicken	Leatherback sea turtle	Humboldt squid	Striped bass	Queen Conch	Monk Seal FFS	Monk Seal MHI
	time units	Year	Year	Year	Year	Year	Year	Year	Year	Year	Week	Year	Year	Year	Year
	1	0.933514	0.972	0.835	0.939	0.862876	0.67	0.5	0.5085	0.0277473	0.0531708	0.00166667	0.000248517	0.346	0.86
	2	0.963915	0.975	0.935	0.939	0.862876	0.76	0.5	0.37	0.74	0.120956	0.323033	0.082085	0.549133	0.82
	3	0.980327	0.975	0.935	0.939	0.862876	0.76	0.5	0.37	0.84	0.168039	0.506617	0.246597	0.710526	0.9
	4	0.981684	0.985	0.935	0.939	0.862876	0.76	0.5	0.37	0.87	0.270672	0.637628	0.367879	0.814815	0.91
	5	0.988377	0.985	0.93	0.939	0.862876	0.76	0.5	0.37	0.8	0.511078	0.718924	0.449329	0.872727	0.96
	6	0.993811	0.985	0.92	0.939	0.950974	0.76			0.85	0.511078	0.778801	0.496585	0.916667	0.96
	7	0.995641	0.987	0.905	0.982	0.950974	0.76			0.84	0.511078	0.826959	0.548812	0.931818	0.96
	8	0.996247	0.987	0.89	0.982	0.950974	0.76			0.74	0.511078	0.860708	0.606531	0.939024	0.96
	9	0.994035	0.987	0.87	0.982	0.950974	0.76			0.75	0.511078	0.860708	0.67032	0.948052	0.96
	10	1	0.987	0.85	0.982	0.98	0.76			0.75	0.690829	0.860708	0.67032	0.945205	0.96
	11	0.987052	0.991	0.81	0.982	0.952386	0.76			0.76	0.779334	0.860708	0.67032	0.942029	0.96
	12	1	0.991	0.765	0.982	0.92753	0.76			0.74	0.779334	0.860708	0.67032	0.938462	0.96
	13	0.99744	0.991	0.7	0.855	0.922055				0.75	0.779334	0.860708	0.67032	0.934426	0.96
	14	0.996472	0.991	0.64	0.855	0.952634				0.85	0.779334	0.860708		0.929825	0.96
	15	0.992596	0.991	0.57	0.855	0.971238				0.86	0.779334	0.860708		0.924528	0.96
	16	0.984109	1	0.48	0.855	0.937878				0.73	0.779334	0.860708		0.918367	0.96
	17	0.988795	1		0.855	0.916427				0.81	0.779334	0.860708		0.911111	0.939334
	18	0.993001	1		0.855	0.894708				0.81	0.779334	0.860708		0.902439	0.929865
	19	0.991945	1		0.855	0.954515				0.78	0.779334	0.860708		0.891892	0.917302
	20	0.975977	1		0.855	0.924018				0.79	0.779334	0.860708		0.878788	0.902418
	21	0.997227	0.997		0.855	0.894188				0.84	0.779334	0.860708		0.862069	0.888401
	22	0.973927	0.997		0.855	0.969417				0.82	0.779334	0.860708		0.84	0.86902
	23	0.986436	0.997		0.855	0.870776				0.8	0.779334	0.860708		0.809524	0.833845
	24	0.998914	0.997		0.855	0.923141				0.8	0.779334	0.860708			0.839346
	25	0.999638	0.997		0.855	0.923141				0.82	0.887407	0.860708			0.796734
	26	0.97717	0.997			0.923141				0.83	0.906823	0.860708			0.764689
	27	0.97812	0.997			0.923141				0.83	0.906823	0.860708			0.73634
	28	0.982559	0.997			0.923141				0.79	0.906823	0.860708			0.698551
	29	0.974918	0.997			0.923141				0.82	0.906823	0.860708			0.639934
	30	0.987334	0.997			0.923141				0.79	0.906823	0.860708
	31	0.987172	0.996			0.923141				0.8	0.906823	0.860708
	32	0.97198	0.996			0.923141				0.75	0.906823	0.860708
	33	0.984123	0.996			0.923141					0.906823	0.860708
	34	0.975377	0.996			0.923141					0.906823	0.860708
	35	0.95778	0.996			0.923141					0.906823	0.860708
	36	0.986367	0.996			0.923141					0.906823	0.860708
	37	0.988482	0.996			0.923141					0.906823	0.860708
	38	0.990678	0.996			0.923141					0.906823	0.860708
	39	0.955304	0.996			0.923141					0.906823	0.860708
	40	0.965526	0.996			0.923141					0.906823	0.860708
	41	0.977046	0.953			0.923141					0.906823	0.860708
	42	0.892455	0.953			0.923141					0.906823
	43	0.960807	0.953			0.923141					0.906823
	44	0.971994	0.953			0.923141					0.906823
	45	0.962417	0.953			0.923141					0.906823
	46	0.970062	0.953								0.906823
	47	0.964441	0.953								0.906823
	48	1	0.953								0.906823
	49	0.998608	0.953								0.906823
	50	0.956809	0.953								0.906823
	51	0.92428	0.932								0.906823
	52	0.955888									0.906823
	53	0.999176									0.906823
	54	0.904328									0.906823
	55	0.915184									0.906823
	56	1									0.906823
	57	0.999003									0.906823
	58	0.894263									0.906823
	59	0.920802									0.906823
	60	1									0.906823
	61	1									0.906823
	62	1.00121									0.906823
	63	0.679365									0.906823
	64	0.996438									0.906823
	65	0.342252									0.906823
	66	0.342252									0.906823
	67										0.906823
	68										0.906823
	69										0.906823
	70										0.906823
	Overall	0.0173581	0.430042	0.0264186	0.0802088	0.0254637	0.0327359	0.03125	0.00953011	2.48253e-05	2.33735e-09	4.90947e-07	1.86019e-08	0.017	0.0277259
	Log survival
	Log(sk)	African bush elephant	Killer whale	Bighorn sheep	Subantartic fur seal	Wandering albatross	Painted turtle	Egg-laying skink	Lesser Prairie-Chicken	Leatherback sea turtle	Humboldt squid	Striped bass	Queen Conch	Monk Seal FFS	Monk Seal MHI
	at Age
	0	-0.0687997	-0.0283995	-0.180324	-0.0629398	-0.147485	-0.400478	-0.693147	-0.67629	-3.58462	-2.93425	-6.39693	-8.3	-1.06132	-0.150823
	1	-0.0367523	-0.0253178	-0.0672087	-0.0629398	-0.147485	-0.274437	-0.693147	-0.994252	-0.301105	-2.11233	-1.13	-2.5	-0.599415	-0.198451
	2	-0.0198687	-0.0253178	-0.0672087	-0.0629398	-0.147485	-0.274437	-0.693147	-0.994252	-0.174353	-1.78356	-0.68	-1.4	-0.341749	-0.105361
	3	-0.0184855	-0.0151136	-0.0672087	-0.0629398	-0.147485	-0.274437	-0.693147	-0.994252	-0.139262	-1.30685	-0.45	-1	-0.204794	-0.0943107
	4	-0.0116908	-0.0151136	-0.0725707	-0.0629398	-0.147485	-0.274437	-0.693147	-0.994252	-0.223144	-0.671233	-0.33	-0.8	-0.136132	-0.040822
	5	-0.00620836	-0.0151136	-0.0833816	-0.0629398	-0.0502686	-0.274437			-0.162519	-0.671233	-0.25	-0.7	-0.0870114	-0.040822
	6	-0.00436889	-0.0130852	-0.0998203	-0.018164	-0.0502686	-0.274437			-0.174353	-0.671233	-0.19	-0.6	-0.0706176	-0.040822
	7	-0.00375993	-0.0130852	-0.116534	-0.018164	-0.0502686	-0.274437			-0.301105	-0.671233	-0.15	-0.5	-0.0629138	-0.040822
	8	-0.00598239	-0.0130852	-0.139262	-0.018164	-0.0502686	-0.274437			-0.287682	-0.671233	-0.15	-0.4	-0.053346	-0.040822
	9	0	-0.0130852	-0.162519	-0.018164	-0.0202027	-0.274437			-0.287682	-0.369863	-0.15	-0.4	-0.0563529	-0.040822
	10	-0.0130328	-0.00904074	-0.210721	-0.018164	-0.0487844	-0.274437			-0.274437	-0.249315	-0.15	-0.4	-0.0597192	-0.040822
	11	0	-0.00904074	-0.267879	-0.018164	-0.0752304	-0.274437			-0.301105	-0.249315	-0.15	-0.4	-0.0635134	-0.040822
	12	-0.00256287	-0.00904074	-0.356675	-0.156654	-0.0811499				-0.287682	-0.249315	-0.15	-0.4	-0.0678226	-0.040822
	13	-0.00353472	-0.00904074	-0.446287	-0.156654	-0.0485242				-0.162519	-0.249315	-0.15		-0.0727594	-0.040822
	14	-0.00743145	-0.00904074	-0.562119	-0.156654	-0.0291836				-0.150823	-0.249315	-0.15		-0.0784716	-0.040822
	15	-0.0160187	0	-0.733969	-0.156654	-0.064135				-0.314711	-0.249315	-0.15		-0.0851578	-0.040822
	16	-0.0112678	0		-0.156654	-0.0872731				-0.210721	-0.249315	-0.15		-0.0930904	-0.0625841
	17	-0.00702342	0		-0.156654	-0.111258				-0.210721	-0.249315	-0.15		-0.102654	-0.0727164
	18	-0.00808765	0		-0.156654	-0.0465519				-0.248461	-0.249315	-0.15		-0.11441	-0.086319
	19	-0.0243165	0		-0.156654	-0.0790242				-0.235722	-0.249315	-0.15		-0.129212	-0.102678
	20	-0.0027773	-0.00300451		-0.156654	-0.111839				-0.174353	-0.249315	-0.15		-0.14842	-0.118332
	21	-0.0264194	-0.00300451		-0.156654	-0.0310606				-0.198451	-0.249315	-0.15		-0.174353	-0.14039
	22	-0.013657	-0.00300451		-0.156654	-0.13837				-0.223144	-0.249315	-0.15		-0.211309	-0.181708
	23	-0.00108619	-0.00300451		-0.156654	-0.0799735				-0.223144	-0.249315	-0.15			-0.175133
	24	-0.00036237	-0.00300451		-0.156654	-0.0799735				-0.198451	-0.119452	-0.15			-0.227235
	25	-0.023095	-0.00300451			-0.0799735				-0.18633	-0.0978082	-0.15			-0.268285
	26	-0.0221233	-0.00300451			-0.0799735				-0.18633	-0.0978082	-0.15			-0.306063
	27	-0.0175947	-0.00300451			-0.0799735				-0.235722	-0.0978082	-0.15			-0.358747
	28	-0.0254021	-0.00300451			-0.0799735				-0.198451	-0.0978082	-0.15			-0.44639
	29	-0.0127468	-0.00300451			-0.0799735				-0.235722	-0.0978082	-0.15
	30	-0.0129112	-0.00400802			-0.0799735				-0.223144	-0.0978082	-0.15
	31	-0.0284205	-0.00400802			-0.0799735				-0.287682	-0.0978082	-0.15
	32	-0.0160039	-0.00400802			-0.0799735					-0.0978082	-0.15
	33	-0.0249316	-0.00400802			-0.0799735					-0.0978082	-0.15
	34	-0.0431372	-0.00400802			-0.0799735					-0.0978082	-0.15
	35	-0.0137271	-0.00400802			-0.0799735					-0.0978082	-0.15
	36	-0.011585	-0.00400802			-0.0799735					-0.0978082	-0.15
	37	-0.00936566	-0.00400802			-0.0799735					-0.0978082	-0.15
	38	-0.0457254	-0.00400802			-0.0799735					-0.0978082	-0.15
	39	-0.0350826	-0.00400802			-0.0799735					-0.0978082	-0.15
	40	-0.0232211	-0.0481404			-0.0799735					-0.0978082	-0.15
	41	-0.113779	-0.0481404			-0.0799735					-0.0978082
	42	-0.0399818	-0.0481404			-0.0799735					-0.0978082
	43	-0.0284059	-0.0481404			-0.0799735					-0.0978082
	44	-0.0383071	-0.0481404			-0.0799735					-0.0978082
	45	-0.0303957	-0.0481404								-0.0978082
	46	-0.0362065	-0.0481404								-0.0978082
	47	0	-0.0481404								-0.0978082
	48	-0.00139248	-0.0481404								-0.0978082
	49	-0.0441513	-0.0481404								-0.0978082
	50	-0.0787401	-0.0704225								-0.0978082
	51	-0.045115									-0.0978082
	52	-0.000824213									-0.0978082
	53	-0.100563									-0.0978082
	54	-0.0886305									-0.0978082
	55	0									-0.0978082
	56	-0.00099716									-0.0978082
	57	-0.111756									-0.0978082
	58	-0.0825103									-0.0978082
	59	0									-0.0978082
	60	0									-0.0978082
	61	0.00121084									-0.0978082
	62	-0.386597									-0.0978082
	63	-0.00356815									-0.0978082
	64	-1.07221									-0.0978082
	65	-1.07221									-0.0978082
	66										-0.0978082
	67										-0.0978082
	68										-0.0978082
	69										-0.0978082
	70
	Sum	-4.05369	-0.843872	-3.63369	-2.52312	-3.6705	-3.41928	-3.46574	-4.6533	-10.6036	-19.8742	-14.5269	-17.8	-4.07454	-3.58539
	Fecundity
	to Age	African bush elephant	Killer whale	Bighorn sheep	Subantartic fur seal	Wandering albatross	Painted turtle	Egg-laying skink	Lesser Prairie-Chicken	Leatherback sea turtle	Humboldt squid	Striped bass	Queen Conch	Monk Seal FFS	Monk Seal MHI
	time units	Year	Year	Year	Year	Year	Year	Year	Year	Year	Week	Year	Year	Year	Year
	1	0	0	0	0	0	0	0	0	0	0	0	0	0	0
	2	0	0	0	0	0	0	0	26.2326	0	0	0	0	0	0
	3	0	0	0	0	0	0	16	26.2326	0	0	0	0	0	0
	4	0	0	0	0	0	0	16	26.2326	0	0	0	5.37578e+06	0	0
	5	0	0	3.78522	0	0	0	0	26.2326	0	0	0	5.37578e+06	0	3.27885
	6	0	0	3.78522	0	0	0	0	0	0	0	0	5.37578e+06	0	3.27885
	7	0	0	3.78522	1.78107	0	5.09125	0	0	0	0	0	5.37578e+06	6.53595	3.27885
	8	0	0	3.78522	1.78107	0	5.09125	0	0	0	0	59908.2	5.37578e+06	6.53595	3.27885
	9	0	0	3.78522	1.78107	0	5.09125	0	0	0	0	59908.2	5.37578e+06	6.53595	3.27885
	10	0	0	3.78522	1.78107	0	5.09125	0	0	0	0	59908.2	5.37578e+06	6.53595	3.27885
	11	0	0	3.78522	1.78107	1.12205	5.09125	0	0	0	0	59908.2	5.37578e+06	6.53595	3.27885
	12	0	0	3.78522	1.78107	1.12205	5.09125	0	0	0	0	59908.2	5.37578e+06	6.53595	3.27885
	13	0	0	3.78522	1.78107	1.12205	0	0	0	0	0	59908.2	5.37578e+06	6.53595	3.27885
	14	1.80031	0.101102	3.78522	0	1.12205	0	0	0	0	0	59908.2	0	6.53595	3.27885
	15	1.80031	0.101102	0	0	1.12205	0	0	0	0	0	59908.2	0	6.53595	3.27885
	16	1.80031	0.101102	0	0	1.12205	0	0	0	2369.5	0	59908.2	0	0	0
	17	1.80031	0.101102	0	0	1.12205	0	0	0	2369.5	0	59908.2	0	0	0
	18	1.80031	0.101102	0	0	1.12205	0	0	0	2369.5	0	59908.2	0	0	0
	19	1.80031	0.101102	0	0	1.12205	0	0	0	2369.5	0	59908.2	0	0	0
	20	1.80031	0.101102	0	0	1.12205	0	0	0	2369.5	0	59908.2	0	0	0
	21	1.80031	0.101102	0	0	1.12205	0	0	0	2369.5	0	59908.2	0	0	0
	22	1.80031	0.101102	0	0	1.12205	0	0	0	2369.5	0	59908.2	0	0	0
	23	1.80031	0.101102	0	0	1.12205	0	0	0	2369.5	0	59908.2	0	0	0
	24	1.80031	0.101102	0	0	1.12205	0	0	0	2369.5	0	59908.2	0	0	0
	25	1.80031	0.101102	0	0	1.12205	0	0	0	2369.5	0	59908.2	0	0	0
	26	1.80031	0.101102	0	0	1.12205	0	0	0	2369.5	0	59908.2	0	0	0
	27	1.80031	0.101102	0	0	1.12205	0	0	0	2369.5	0	59908.2	0	0	0
	28	1.80031	0.101102	0	0	1.12205	0	0	0	2369.5	0	59908.2	0	0	0
	29	1.80031	0.101102	0	0	1.12205	0	0	0	2369.5	0	59908.2	0	0	0
	30	1.80031	0.101102	0	0	1.12205	0	0	0	2369.5	0	59908.2	0	0	0
	31	1.80031	0.101102	0	0	1.12205	0	0	0	2369.5	0	59908.2	0	0	0
	32	1.80031	0.101102	0	0	1.12205	0	0	0	2369.5	0	59908.2	0	0	0
	33	1.80031	0.101102	0	0	1.12205	0	0	0	0	0	59908.2	0	0	0
	34	1.80031	0.101102	0	0	1.12205	0	0	0	0	0	59908.2	0	0	0
	35	1.80031	0.101102	0	0	1.12205	0	0	0	0	0	59908.2	0	0	0
	36	1.80031	0.101102	0	0	1.12205	0	0	0	0	0	59908.2	0	0	0
	37	1.80031	0	0	0	1.12205	0	0	0	0	0	59908.2	0	0	0
	38	1.80031	0	0	0	1.12205	0	0	0	0	0	59908.2	0	0	0
	39	1.80031	0	0	0	1.12205	0	0	0	0	0	59908.2	0	0	0
	40	1.80031	0	0	0	1.12205	0	0	0	0	0	59908.2	0	0	0
	41	1.80031	0	0	0	1.12205	0	0	0	0	0	59908.2	0	0	0
	42	1.80031	0	0	0	1.12205	0	0	0	0	0	0	0	0	0
	43	1.80031	0	0	0	1.12205	0	0	0	0	0	0	0	0	0
	44	1.80031	0	0	0	1.12205	0	0	0	0	0	0	0	0	0
	45	1.80031	0	0	0	1.12205	0	0	0	0	0	0	0	0	0
	46	0	0	0	0	0	0	0	0	0	0	0	0	0	0
	47	0	0	0	0	0	0	0	0	0	0	0	0	0	0
	48	0	0	0	0	0	0	0	0	0	0	0	0	0	0
	49	0	0	0	0	0	0	0	0	0	0	0	0	0	0
	50	0	0	0	0	0	0	0	0	0	0	0	0	0	0
	51	0	0	0	0	0	0	0	0	0	0	0	0	0	0
	52	0	0	0	0	0	0	0	0	0	0	0	0	0	0
	53	0	0	0	0	0	0	0	0	0	0	0	0	0	0
	54	0	0	0	0	0	0	0	0	0	0	0	0	0	0
	55	0	0	0	0	0	0	0	0	0	0	0	0	0	0
	56	0	0	0	0	0	0	0	0	0	0	0	0	0	0
	57	0	0	0	0	0	0	0	0	0	0	0	0	0	0
	58	0	0	0	0	0	0	0	0	0	0	0	0	0	0
	59	0	0	0	0	0	0	0	0	0	0	0	0	0	0
	60	0	0	0	0	0	0	0	0	0	0	0	0	0	0
	61	0	0	0	0	0	0	0	0	0	0	0	0	0	0
	62	0	0	0	0	0	0	0	0	0	4.75371e+07	0	0	0	0
	63	0	0	0	0	0	0	0	0	0	4.75371e+07	0	0	0	0
	64	0	0	0	0	0	0	0	0	0	4.75371e+07	0	0	0	0
	65	0	0	0	0	0	0	0	0	0	4.75371e+07	0	0	0	0
	66	0	0	0	0	0	0	0	0	0	4.75371e+07	0	0	0	0
	67	0	0	0	0	0	0	0	0	0	4.75371e+07	0	0	0	0
	68	0	0	0	0	0	0	0	0	0	4.75371e+07	0	0	0	0
	69	0	0	0	0	0	0	0	0	0	4.75371e+07	0	0	0	0
	70	0	0	0	0	0	0	0	0	0	4.75371e+07	0	0	0	0
	Overall	57.6099	2.32535	37.8522	12.4675	39.2716	30.5475	32	104.931	40281.5	4.27834e+08	2.03688e+06	5.37578e+07	58.8235	36.0674
